# Supplementary material
Source: Royal Society of Chemistry journal article supplement (doi:10.1039/d6lf00195e)
Supplement: d6lf00195e1.pdf [file d6lf00195e1.pdf]

## Supporting Information

### $\alpha$ and $\beta$ -motifs Interstratified $\beta_{bc}$ -Nickel Hydroxide for Enhanced OER and UOR Electrocatalysis

C. M. Avinash,<sup>1</sup> C. Nethravathi<sup>1,2\*</sup> Michael Rajamathi<sup>1\*</sup>

<sup>1</sup>Materials Research Group, St. Joseph's University, 36 Lalbagh Road, Bangalore 560027, India

<sup>2</sup>Department of Chemistry, Mount Carmel College, 58 Palace Road, Vasanth Nagar, Bangalore 560052, India

Corresponding Author. Email: michael.rajamathi@sju.edu.in; [nethravathic@gmail.com](mailto:nethravathic@gmail.com)

#### DIFFaX simulation

The structure parameters of  $\beta$ -nickel hydroxide were obtained from JCPDS-PDF 003-0177. Hydrogen atoms and the intercalated anions were not included in the calculation. A Lorentzian peak broadening of  $0.5^\circ$  was employed to account for the instrumental broadening and the other unaccounted causes. A platelet thickness of  $\sim 10$  nm (20 layers in registry) was assumed and the percentage of  $\alpha$ -motifs was varied from 0 to 20. The best fit was found for 12%  $\alpha$ -motifs.

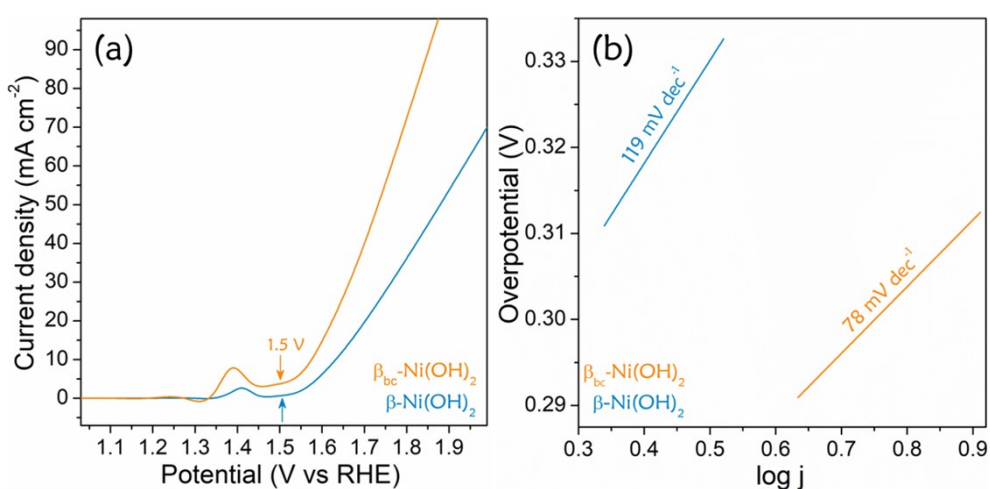

**Figure S1** Data without IR correction: (a) LSV and the corresponding (b) Tafel plot ( $\eta$  vs  $\log j$ ) of  $\beta$ -nickel hydroxide and  $\beta_{bc}$ -nickel hydroxide recorded at a scan rate of  $1 \text{ mV s}^{-1}$  respectively in 1M KOH.

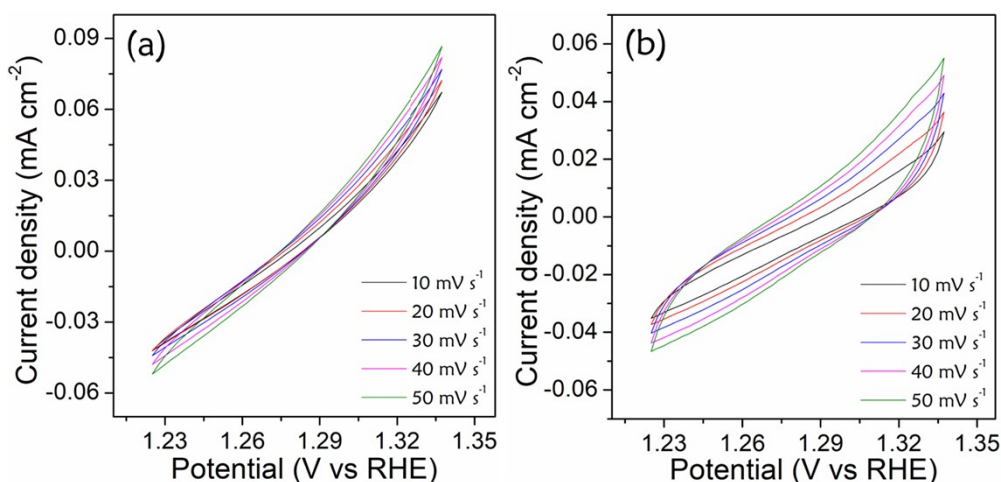

**Figure S2** Cyclic voltammograms of (a)  $\beta$ -nickel hydroxide and (b)  $\beta_{bc}$ -nickel hydroxide recorded at various scan rates in 1 M KOH. This data was used to estimate the electrochemical surface area (ECSA) of the electrode materials.

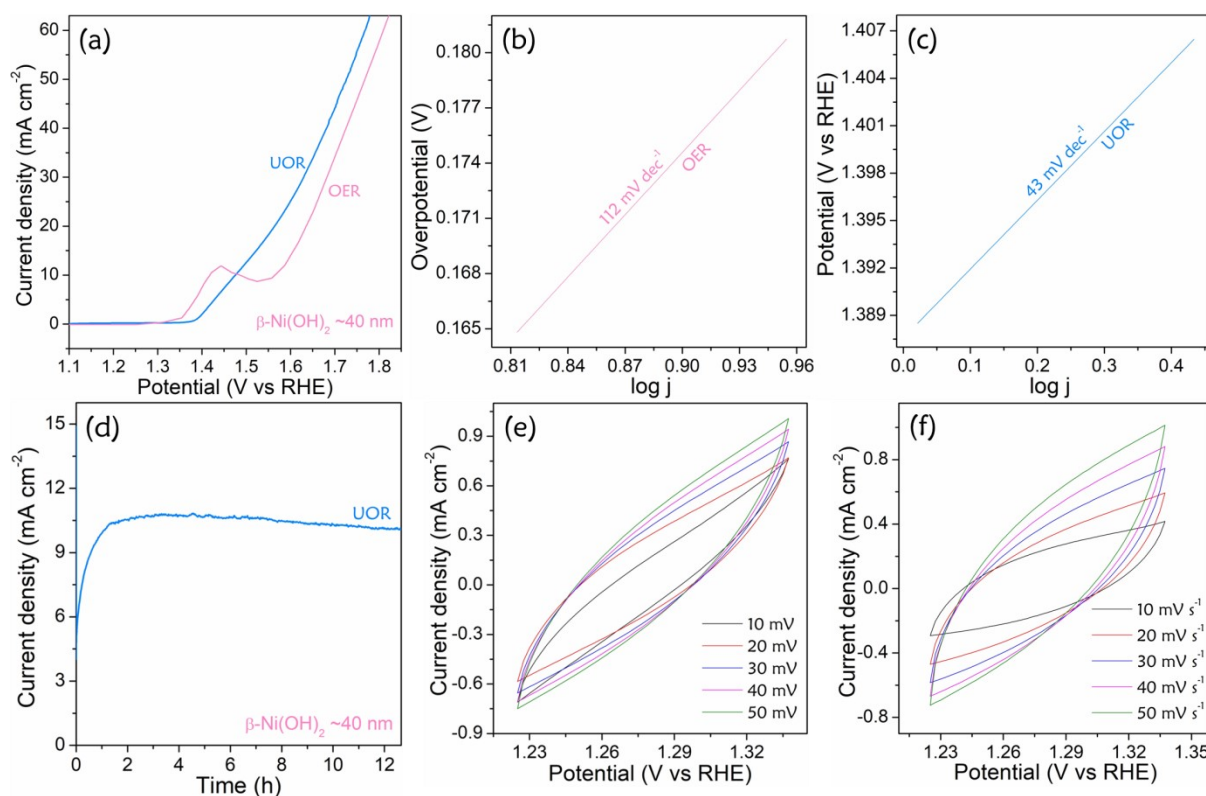

**Figure S3** Electrochemical studies of  $\sim 40$  nm  $\beta$ -nickel hydroxide obtained by hydrothermal treatment of  $\beta_{bc}$ -nickel hydroxide in 0.2 M KOH for 12h. LSV @  $5 \text{ mV s}^{-1}$  in 1 M KOH without urea (OER) and with 0.33 M urea (UOR) (a); Tafel plot ( $\eta$  vs  $\log j$ ) (b and c); Chronoamperometry ( $j$  vs  $t$ ) at an applied potential of  $1.4 \text{ V}_{\text{RHE}}$  in 1 M KOH + 0.33 M urea (UOR) (d); Cyclic voltammograms at various scan rates in 1 M KOH (OER) (e) and 1 M KOH + 0.33 M urea (UOR) (f). This data was used to estimate the electrochemical surface area (ECSA) of the electrode material.

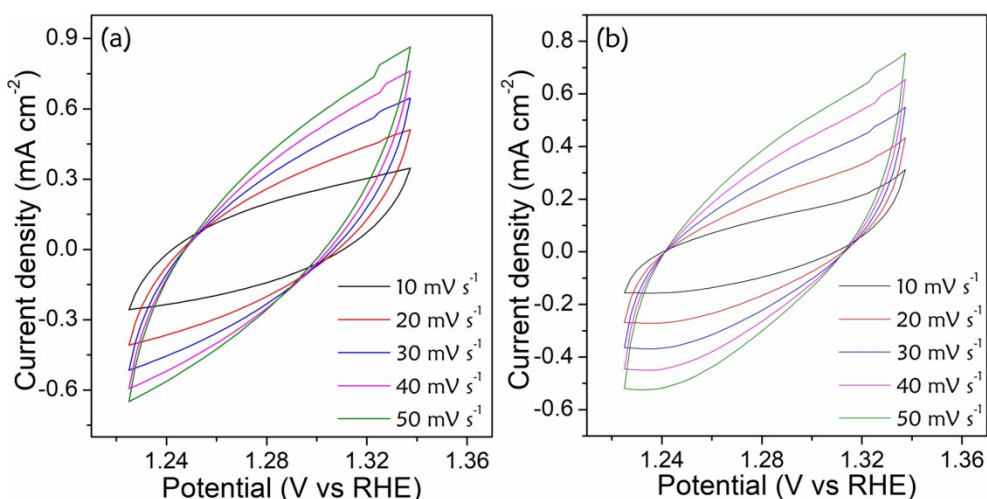

**Figure S4** Cyclic voltammograms of (a)  $\beta$ -nickel hydroxide and (b)  $\beta_{bc}$ -nickel hydroxide recorded at various scan rate in 1M KOH + 0.33 M urea. This data was used to estimate the electrochemical surface area (ECSA) of the electrode materials.

**Table S1** Comparison of the electrocatalytic OER activity of various nickel hydroxide-based materials reported in the literature.

| Catalyst                                                                   | OER: $\eta_{10}$ (mV) | Tafel slope (mV/dec) | Ref       |
|----------------------------------------------------------------------------|-----------------------|----------------------|-----------|
| $\beta_{bc}$ -Ni(OH) <sub>2</sub>                                          | 320                   | 60                   | this work |
| $\beta$ -Ni(OH) <sub>2</sub>                                               | 370                   | 95                   |           |
| $\alpha$ -Ni(OH)NO <sub>3</sub> hollow spheres                             | 331                   | 42                   | 1         |
| $\beta$ -Ni(OH) <sub>2</sub> hexagonal plates                              | 444                   | 111                  |           |
| CNT/ultra-thin $\beta$ -Ni(OH) <sub>2</sub> nanoplate                      | 474                   | 87                   | 2         |
| Ultrathin $\beta$ -Ni(OH) <sub>2</sub>                                     | 470                   | 60                   |           |
| Ultrathin $\beta$ -Ni <sub>0.78</sub> Fe <sub>0.22</sub> (OH) <sub>2</sub> | 320                   | 35                   | 3         |
| $\beta$ -Ni(OH) <sub>2</sub> films                                         | 421                   | 58                   |           |
| rGO- $\beta$ -Ni(OH) <sub>2</sub>                                          | 378                   | 56                   | 4         |
| Electrodeposited Ni(OH) <sub>2</sub> on CNT                                | 358                   | -                    |           |
| CoNi(OH) <sub>2</sub> Nanoflowers @V <sub>2</sub> O <sub>5</sub>           | 350                   | 108                  | 6         |
| Ultrathin Ni(OH) <sub>2</sub> nanosheet                                    | 330                   | 41                   | 7         |
| $\beta$ -NiS@ $\beta$ -Ni(OH) <sub>2</sub>                                 | 330                   | 53                   | 8         |
| NiV-LDH                                                                    | 318                   | 50                   | 9         |
| Ni/Ni(OH) <sub>2</sub> Hybrid                                              | 310                   | 75                   | 10        |
| Electrodeposited $\alpha$ -Ni(OH) <sub>2</sub> on Ti                       | 310                   | 42.6                 | 11        |
| $\beta$ -Ni(OH) <sub>2</sub> nanoparticles                                 | 300                   | 53                   | 12        |
| NiFe-dodecyl sulfate LDH                                                   | 318                   | 80                   |           |
| NiFe-dodecyl sulfate LDH                                                   | 300                   | 36                   | 14        |
| NiFe LDH nanosheets                                                        | 300                   | 40                   | 15        |
| Ni(OH) <sub>2</sub>                                                        | 290                   | 123.5                | 16        |
| Sn-Ni(OH) <sub>2</sub>                                                     | 246                   | 65.5                 |           |
| CoFe <sub>2</sub> O <sub>4</sub> / $\beta$ -Ni(OH) <sub>2</sub>            | 278                   | 67                   | 17        |
| $\beta$ -Fe-Ni(OH) <sub>2</sub>                                            | 260                   | 32                   | 18        |
| NF/NiMoO <sub>4</sub> /NiS/Ni(OH) <sub>2</sub>                             | 260                   | 110                  | 19        |
| Yolk-Shell $\alpha/\beta$ -Ni(OH) <sub>2</sub> /Carbon                     | 254                   | 55                   | 20        |
| $\beta$ -Fe-Ni(OH) <sub>2</sub> /nickel foam                               | 219                   | 53                   | 21        |
| $\beta$ -Ni(OH) <sub>2</sub> nanoribbon                                    | 210                   | 74                   | 22        |

|                                                  |     |     |    |
|--------------------------------------------------|-----|-----|----|
| Ultrathin $\alpha$ -Ni(OH) <sub>2</sub> /Ni Foam | 192 | 108 | 23 |
|--------------------------------------------------|-----|-----|----|

- M. Gao, W. Sheng, Z. Zhuang, Q. Fang, S. Gu, J. Jiang, Y. Yan. Efficient Water Oxidation Using Nanostructured  $\alpha$ -Nickel-Hydroxide as an Electrocatalyst. *J. Am. Chem. Soc.* 2014, 136, 7077–7084
- X. Zhou, Z. Xia, Z. Zhang, Y. Ma, Y. Qu. One-step synthesis of multi-walled carbon nanotubes/ultra-thin Ni(OH)<sub>2</sub> nanoplate composite as efficient catalysts for water oxidation. *J. Mater. Chem. A*, 2014, 2, 11799–11806.
- K. Yan, M. Sheng, X. Sun, C. Song, Z. Cao, Y. Sun. Microwave Synthesis of Ultrathin Nickel Hydroxide Nanosheets with Iron Incorporation for Electrocatalytic Water Oxidation. *ACS Appl. Energy Mater.* 2019, 2, 3, 1961–1968.
- K. Bramhaiah, C. Alex, V.N. Singh, N. S. John. Hybrid Films of Ni(OH)<sub>2</sub> Nanowall Networks on Reduced Graphene Oxide Prepared at a Liquid/Liquid Interface for Oxygen Evolution and Supercapacitor Applications. *Chemistry Select* 2019, 4, 2519 –2528.
- S.-Y. Leea, S.-J. Kimb, W. J. Leeb, Y.-K. Lee. Boosting Activity and Durability of Electrodeposited Ni(OH)<sub>2</sub> Catalyst Using Carbon Nanotube-grafted Substrates for Alkaline Oxygen Evolution Reaction (OER). *ACS Appl. Nano Mater.* 2021, 4, 10, 10267–10274.
- S. Prabu, M. Subramani, B. K. Chang, K.-Y. Chiang. CoNi(OH)<sub>2</sub> Nanoflowers on V<sub>2</sub>O<sub>5</sub> for Energy Storage and Electrocatalysis. *ACS Appl. Nano Mater.* 2025, 8, 14083–14094.
- P. Tian, Y. Yu, X. Yina, X. Wang. Wafer-scale 1-nm Ni(OH)<sub>2</sub> Nanosheet with Superior Electrocatalytic activity for Oxygen Evolution Reaction. *Nanoscale*, 2018, **10**, 5054-5059
- B. J. Rani, N. Dhivya, G. Ravi, S. S. Zance, R. Yuvakkumar, S. I. Hong. Electrochemical Performance of  $\beta$ -NiS@Ni(OH)<sub>2</sub> Nanocomposite for Water Splitting Applications. *ACS Omega* 2019, 4, 10302-10310.
- K. Fan, H. Chen, Y. Ji, H. Huang, P. M. Claesson, Q. Daniel, B. Philippe, H. Rensmo, F. Li, Y. Luo, L. Sun. Nickel–vanadium monolayer double hydroxide for efficient electrochemical water oxidation. *Nat. Commun.* 2016, 7, 11981.
- D. Lim, S. Kim, N. Kim, E. Oh, S. E. Shim, S.-H. Baeck. Strongly Coupled Ni/Ni(OH)<sub>2</sub> Hybrid Nanocomposites as Highly Active Bifunctional Electrocatalysts for Overall Water Splitting. *ACS Sustainable Chem. Eng.* 2020, 8, 11, 4431–4439
- S. Tao, Q. Wen, W. Jaegermann, B. Kaiser. Formation of Highly Active NiO(OH) Thin Films from Electrochemically Deposited Ni(OH)<sub>2</sub> by a Simple Thermal Treatment at a Moderate Temperature: A Combined Electrochemical and Surface Science Investigation. *ACS Catal.* 2022, 12, 2, 1508–1519
- L.-A. Stern, X. Hu. Enhanced oxygen evolution activity by NiO<sub>x</sub> and Ni(OH)<sub>2</sub> nanoparticles. *Faraday Discussions* 2014, **176**, 363-379.
- J. A. Carrasco, R. S.-Gual, A. S.-Da Silva, G. Abellán, E Coronado. Influence of the Interlayer Space on the Water Oxidation Performance in a Family of Surfactant-Intercalated NiFe-Layered Double Hydroxides. *Chem. Mater.* 2019, 31, 6798–6807.
- L. Dang, H. Liang, J. Zhuo, K. Lamb, H. Sheng, Y. Yang, S. Jin. Direct Synthesis and Anion Exchange of Noncarbonate-Intercalated NiFe-Layered Double Hydroxides and the Influence on Electrocatalysis. *Chem. Mater.* 2018, 30, 4321–4330.
- F. Song, X. Hu. Exfoliation of layered double hydroxides for enhanced oxygen evolution catalysis. *Nat. Commun.* 2014, 5, 4477.
- J. Jian, X. Kou, H. Wang, L. Chang, L. Zhang, S. Gao, Y. Xua, H. Yuan. Fascinating Tin-Effects on the Enhanced and Large-Current-Density Water Splitting Performance of Sn-Ni(OH)<sub>2</sub>. *ACS Appl. Mater. Interfaces* 2021, 13, 36, 42861–42869.
- K. Min, M. Kim, C. Lim, S. E. Shim, D. Lim, S.-H. Baeck. Hexagonal CoFe<sub>2</sub>O<sub>4</sub>/ $\beta$  Ni(OH)<sub>2</sub> heterojunction composite as an advanced electrocatalyst for the oxygen evolution reaction. *Int. J. Hydrogen Energy* 2021, 46, 27874-27882.

18. K. Zhu, H. Liu, M. Li, X. Li, J. Wang, X. Zhu, W. Yang. Yanga. Atomic-scale topochemical preparation of crystalline Fe<sup>3+</sup> doped  $\beta$ -Ni(OH)<sub>2</sub> for ultrahigh-rate oxygen evolution reaction. *J. Mater. Chem. A*, 2017, **5**, 7753-7758.
19. Marilia B. Dalla Benetta, Eithne Dempsey, and Carmel B. Breslin. Corrosion-Engineered Room-Temperature Deposition of NiMoO<sub>4</sub>/NiS/Ni(OH)<sub>2</sub> at Nickel Foam: An Efficient Strategy and Electrocatalyst for the Oxygen Evolution Reaction. *ACS Appl. Energy Mater.* 2024, **7**, 11703–11713.
20. G. Dey, S. Saifi, A. K. Yadav, S. Awasthi, A. S. K. Sinha, A. Aijaz. Yolk–Shell  $\alpha$ -/ $\beta$ -Ni(OH)<sub>2</sub>/Carbon Nanostructure for an Efficient Oxygen Evolution Reaction. *Cryst. Growth Des.* 2024, **24**, 20, 8310–8318.
21. T. Kou, S. Wang, J. L. Hauser, M. Chen, S. R. J. Oliver, Y. Ye, J. Guo, Y. Li. Ni Foam Supported Fe-doped  $\beta$ -Ni(OH)<sub>2</sub> Nanosheets Shows Ultralow Overpotential for Oxygen Evolution Reaction. *ACS Energy Lett.* 2019, **4**, 3, 622–628.
22. X. P. Wang, H. J. Wu, S. B. Xi, W. S. V. Lee, J. Zhang, Z. H. Wu, J. O. Wang, T. D. Hu, L. M. Liu, Y. Han, S. W. Chee, S. C. Ning, U. Mirsaidov, Z. B. Wang, Y. W. Zhang, A. Borgna, J. Wang, Y. H. Du, Z. G. Yu, S. J. Pennycook, J. M. Xue. Strain stabilized nickel hydroxide nanoribbons for efficient water splitting. *Energy Environ. Sci.*, 2020, **13**, 229-237.
23. Li-Ming Cao, Qing-Cai Cao, Jia Zhang, Xuan-Yi Zhu, Rong-Zhi Sun, Zi-Yi Du, and Chun-Ting He. Electrochemically Controlled Synthesis of Ultrathin Nickel Hydroxide Nanosheets for Electrocatalytic Oxygen Evolution. *Inorg. Chem.* 2021, **60**, 3365–3374.

**Table S2:** Comparison of the electrocatalytic UOR activity of various nickel hydroxide-based materials reported in the literature.

| Catalyst                                                  | Onset (mV) | Potential (mV) @ 10mA cm <sup>-2</sup> | Tafel slope (mV/dec) | Ref       |
|-----------------------------------------------------------|------------|----------------------------------------|----------------------|-----------|
| $\beta_{bc}$ -Ni(OH) <sub>2</sub>                         | 1.36       | 1.39                                   | 25                   | this work |
| Ultrathin Ni(OH) <sub>2</sub> nanoflakes                  | 1.37       | 1.41                                   | 36                   | 1         |
| Ni(OH) <sub>2</sub> /CuCo/Ni(OH) <sub>2</sub> @ Ni foam   | 1.23       | 1.33                                   | 92                   | 2         |
| 1% Ce: $\alpha$ -Ni(OH) <sub>2</sub> /NF                  | 1.29       | 1.31                                   | 25                   | 3         |
| 1% Ce: $\beta$ -Ni(OH) <sub>2</sub> /NF                   | 1.31       | 1.35                                   | 52                   |           |
| Ni(OH) <sub>2</sub> nanosheets @ Carbon Cloth             | 1.31       | 1.32                                   | 81                   | 4         |
| Single layer $\alpha$ -Ni(OH) <sub>2</sub> @ Carbon Cloth | 1.37       | 1.39                                   | -                    | 5         |
| Oxygen vacancy rich V-Ni(OH) <sub>2</sub>                 | 1.36       | 1.38                                   | 29                   | 6         |
| vanadium doped $\alpha$ -Ni(OH) <sub>2</sub>              | 1.31       | 1.33                                   | 32                   | 7         |
| Metallic Ni(OH) <sub>2</sub> nanosheets                   | 1.37       | 1.39                                   | -                    | 8         |
| V <sub>Ni</sub> rich $\alpha$ -Ni(OH) <sub>2</sub>        | 1.37       | 1.39                                   | 30                   | 9         |
| Ni(OH) <sub>2</sub> @ Nickel Foam                         | 1.34       | 1.35                                   | 24                   | 10        |
| $\alpha$ -nickel hydroxy chloride                         | 1.32       | 1.34                                   | 41                   | 11        |
| $\beta$ -Ni(OH) <sub>2</sub>                              | 1.35       | 1.38                                   | 74                   |           |
| 1% Cu: $\alpha$ -Ni(OH) <sub>2</sub> /NF                  | 1.31       | 1.34                                   | 38                   | 12        |
| Ni(OH)S                                                   | 1.31       | 1.34                                   | 52                   | 13        |
| NiCo-LDHs                                                 | 1.35       | 1.37                                   | -                    | 14        |
| $\beta$ -Ni(OH) <sub>2</sub> -NF                          | 1.33       | -                                      | 122                  | 15        |
| $\alpha$ -Ni(OH) <sub>2</sub> /NF                         | 1.33       | -                                      | 61                   |           |
| Co-Ni(OH) <sub>2</sub> /NF                                | 1.30       | 1.35                                   | 24                   |           |
| Porous Ni(OH) <sub>2</sub> nanosheets                     | 1.42       | 1.45                                   | 43                   | 16        |
| Ru nanoparticles – V doped NiFe LDH                       | 1.37       | 1.4                                    | -                    | 17        |

1. W. Yang, X. Yang, C. Hou, B. Li, H. Gao, J. Lin, X. Luo. Rapid room-temperature fabrication of ultrathin Ni(OH)<sub>2</sub> nanoflakes with abundant edge sites for efficient urea oxidation. *Appl. Catal. B* 259, 2019, 118020.
2. S. Parvin, E. Aransiola, M. Ammar, S. Lee, L. Zhang, J. Weber, J. Baltrusaitis. Tailored Ni(OH)<sub>2</sub>/CuCo/Ni(OH)<sub>2</sub> Composite Interfaces for Efficient and Durable Urea Oxidation Reaction. *ACS Appl. Mater. Interfaces* 2024, 16, 67715–67729.
3. J. Xie, W. Liu, X. Zhang, Y. Guo, L. Gao, F. Lei, B. Tang, Y. Xie. Constructing Hierarchical Wire-on-Sheet Nanoarrays in Phase-Regulated Cerium-Doped Nickel Hydroxide for Promoted Urea Electrooxidation. *ACS Materials Lett.* 2019, 1, 1, 103–110.
4. J. Chen, S. Ci, G. Wang, N. Senthilkumar, M. Zhang, Q. Xu, Z. Wen. Ni(OH)<sub>2</sub> Nanosheet Electrocatalyst toward Alkaline Urea Electrolysis for Energy-Saving Acidic Hydrogen Production. *ChemElectroChem* 2019, 6, 5313–5320.
5. Lin, C.; Gao, Z.; Zhang, F.; Yang, J.; Liu, B.; Jin, J. In Situ Growth of Single-Layered  $\alpha$ -Ni(OH)<sub>2</sub> Nanosheets on a Carbon Cloth for Highly Efficient Electrocatalytic Oxidation of Urea. *J. Mater. Chem. A* 2018, 6 (28), 13867–13873.
6. Qin, H.; Ye, Y.; Li, J.; Jia, W.; Zheng, S.; Cao, X.; Lin, G.; Jiao, L. Synergistic Engineering of Doping and Vacancy in Ni(OH)<sub>2</sub> to Boost Urea Electrooxidation. *Adv. Funct. Mater.* 2023, 33, 2209698.
7. Q. Cao, Y. Yuan, K. Wang, W. Huang, Y. Zhao, X. Sun, R. Ding, W. Lin, E. Liu and P. Gao. Phase and crystallinity regulations of Ni(OH)<sub>2</sub> by vanadium doping boost electrocatalytic urea oxidation reaction. *J. Colloid Interface Sci.*, 2022, 618, 411–418.
8. Zhu, X.; Dou, X.; Dai, J.; An, X.; Guo, Y.; Zhang, L.; Tao, S.; Zhao, J.; Chu, W.; Zeng, X. C.; Wu, C.; Xie, Y. Metallic Nickel Hydroxide Nanosheets Give Superior Electrocatalytic Oxidation of Urea for Fuel Cells. *Angew. Chem., Int. Ed.* 2016, 55, 12465–12469.
9. He, Q.; Wan, Y.; Jiang, H.; Pan, Z.; Wu, C.; Wang, M.; Wu, X.; Ye, B.; Ajayan, P. M.; Song, L. Nickel Vacancies Boost Reconstruction in Nickel Hydroxide Electrocatalyst. *ACS Energy Lett.* 2018, 3 (6), 1373–1380.
10. Xia, L.; Liao, Y.; Qing, Y.; Xu, H.; Gao, Z.; Li, W.; Wu, Y. In Situ Growth of Porous Ultrathin Ni(OH)<sub>2</sub> Nanostructures on Nickel Foam: An Efficient and Durable Catalysts for Urea Electrolysis. *ACS Appl. Energy Mater.* 2020, 3 (3), 2996–3004.
11. Zhang, L.; Wang, L.; Lin, H.; Liu, Y.; Ye, J.; Wen, Y.; Chen, A.; Wang, L.; Ni, F.; Zhou, Z.; Sun, S.; Li, Y.; Zhang, B.; Peng, H. A Lattice-Oxygen-Involved Reaction Pathway to Boost Urea Oxidation. *Angew. Chem., Int. Ed.* 2019, 58 (47), 16820–16825.
12. J. Xie, L. Gao, S. Cao, W. Liu, F. Lei, P. Hao, X. Xia, B. Tang. Copper-Incorporated  $\alpha$ -Ni(OH)<sub>2</sub> Hierarchical Wire-on-Sheet Nanoarrays as Robust Trifunctional Catalysts for Synergistic Hydrogen Generation and Urea Oxidation. *J. Mater. Chem. A*, 2019, 7, 13577–13584.
13. X. Jia, H. Kang, X. Yang, Y. Li, K. Cui, X. Wu, W. Qin, G. Wu. Amorphous Ni(III)-based sulfides as bifunctional water and urea oxidation anode electrocatalysts for hydrogen generation from urea-containing water. *Appl. Catal., B* 2022, 312, 121389.
14. Z. Zheng, D. Wu, L. Chen, S. Chen, H. Wan, G. Chen, N. Zhang, X. Liu, R. Ma. Collaborative optimization of thermodynamic and kinetic for Ni-based hydroxides in electrocatalytic urea oxidation reaction. *Appl. Catal. B* 2024, 340, 123214.

15. L. Chen, W. Jiang, J. Zhang, B. Chu, Z. Zhai, T. Yu, H. He, S. Yin. Comprehensive understanding of the electrocatalytic mechanism for Co/Fe/Cu doped Ni(OH)<sub>2</sub> on urea oxidation reaction: theory and experiment. *ACS Sustainable Chem. Eng.* 2024, 12, 28, 10466–10474.
16. W. Yang, X. Yang, B. Li, J. Lin, H. Gao, C. Hou, X. Luo. Ultrathin nickel hydroxide nanosheets with a porous structure for efficient electrocatalytic urea oxidation. *J. Mater. Chem. A*, 2019, 7, 26364–26370.
17. S. Wang, A. Hao, Z. Liu. Ru Nanoparticles Modified and V-Doped NiFe-Layered Double Hydroxide as Efficient Electrocatalyst for Overall Urea Splitting. *ACS Appl. Nano Mater.* 2024, 7, 24, 28602–28611
